# Supplementary material for: Validation of a multi-omics strategy for prioritizing personalized candidate driver genes
Source: PubMed Central journal article supplement (PMC5122402; doi:10.18632/oncotarget.9540), 2016-05-21
Supplement: oncotarget-07-38440-s001.pdf [file oncotarget-07-38440-s001.pdf]

## Validation of a multi-omics strategy for prioritizing personalized candidate driver genes

### Supplementary Materials

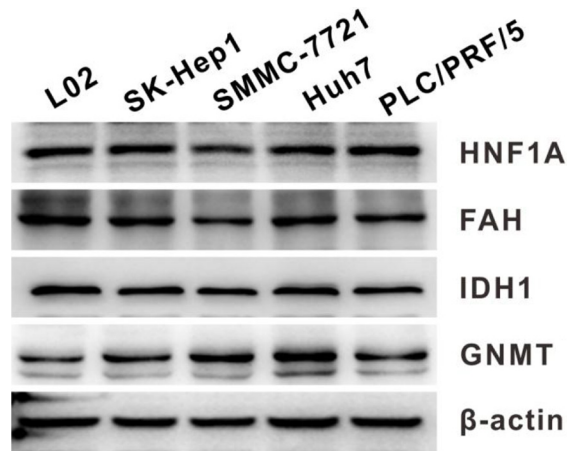

**Supplementary Figure S1: The endogenous expression of *HNF1A*, *IDH1*, *GNMT*, and *FAH* in hepatoma cells and normal hepatic cell line L02.** Total cell lysates were subjected to immunoblotting with the indicated antibodies.  $\beta$ -actin was used as the loading control.

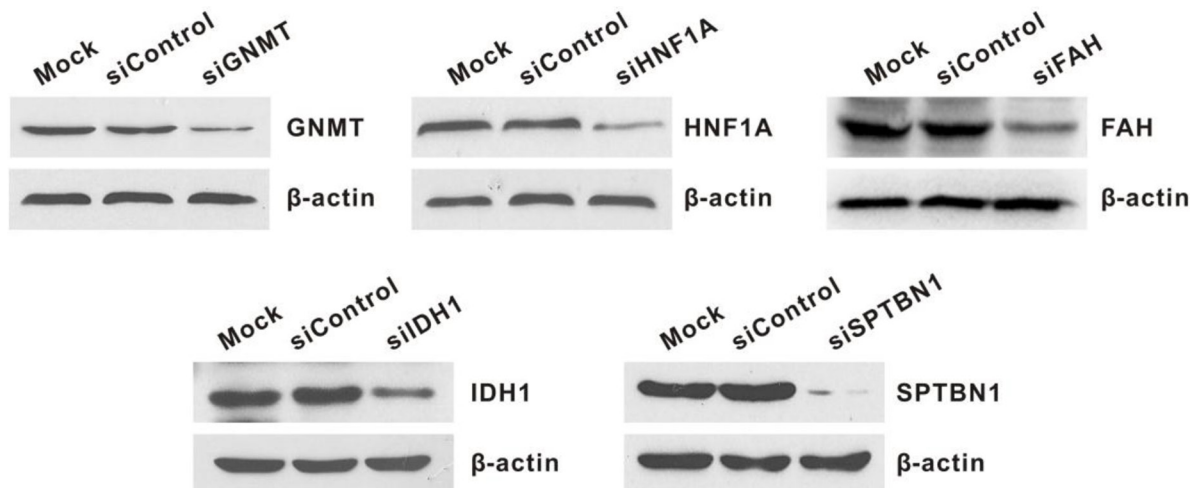

**Supplementary Figure S2: Western blot of siRNA for target genes that reduced the endogenous protein expression.**

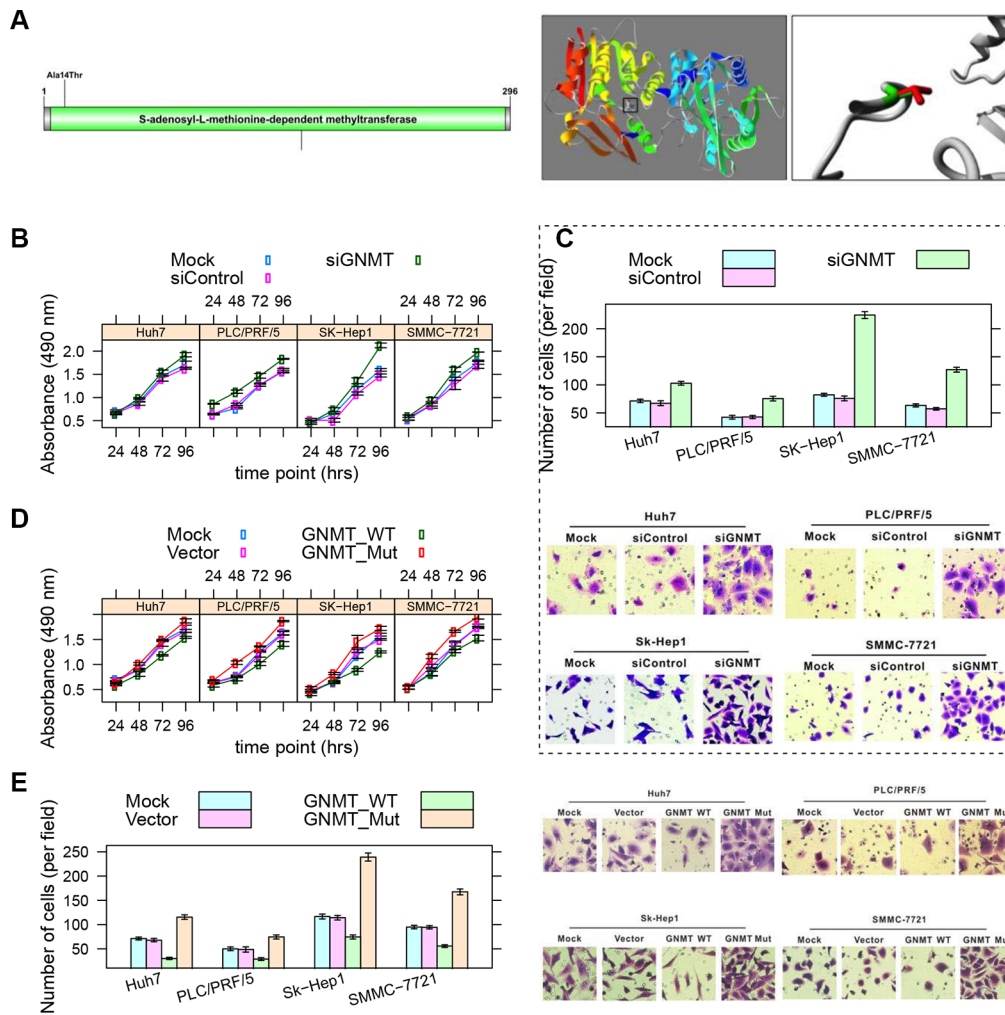

**Supplementary Figure S3: Effects of a loss-of-function mutation in *GNMT*.** (A) Schematic diagram of domains (left) and image of crystallographic model (middle) (PDB: 1R74) of *GNMT*. The Ala14 is located in the SAM-dependent methyltransferase domain. The side chains of both the wild-type and mutant allele residue are shown in green and red, respectively (right). (B) Cell growth curve. Hepatoma cell lines SMMC-7721, SK-Hep1, PLC/PRF/5 and Huh7 cells were infected with AdsiGNMT or AdsiControl, respectively. Cell growth was determined by an MTS assay similar to Figure 3B. (C) Transwell assay of cell migration property in hepatoma cells depletion of *GNMT*. Magnification:  $\times 200$ . (D) Hepatoma cells were mock-transfected or transfected with *GNMT*-WT or *GNMT*-Mut (A14T), respectively. Tumor cell growth was measured by a MTS assay. (E) Cells were treated as described in (D). Cell migration was determined by a transwell assay.

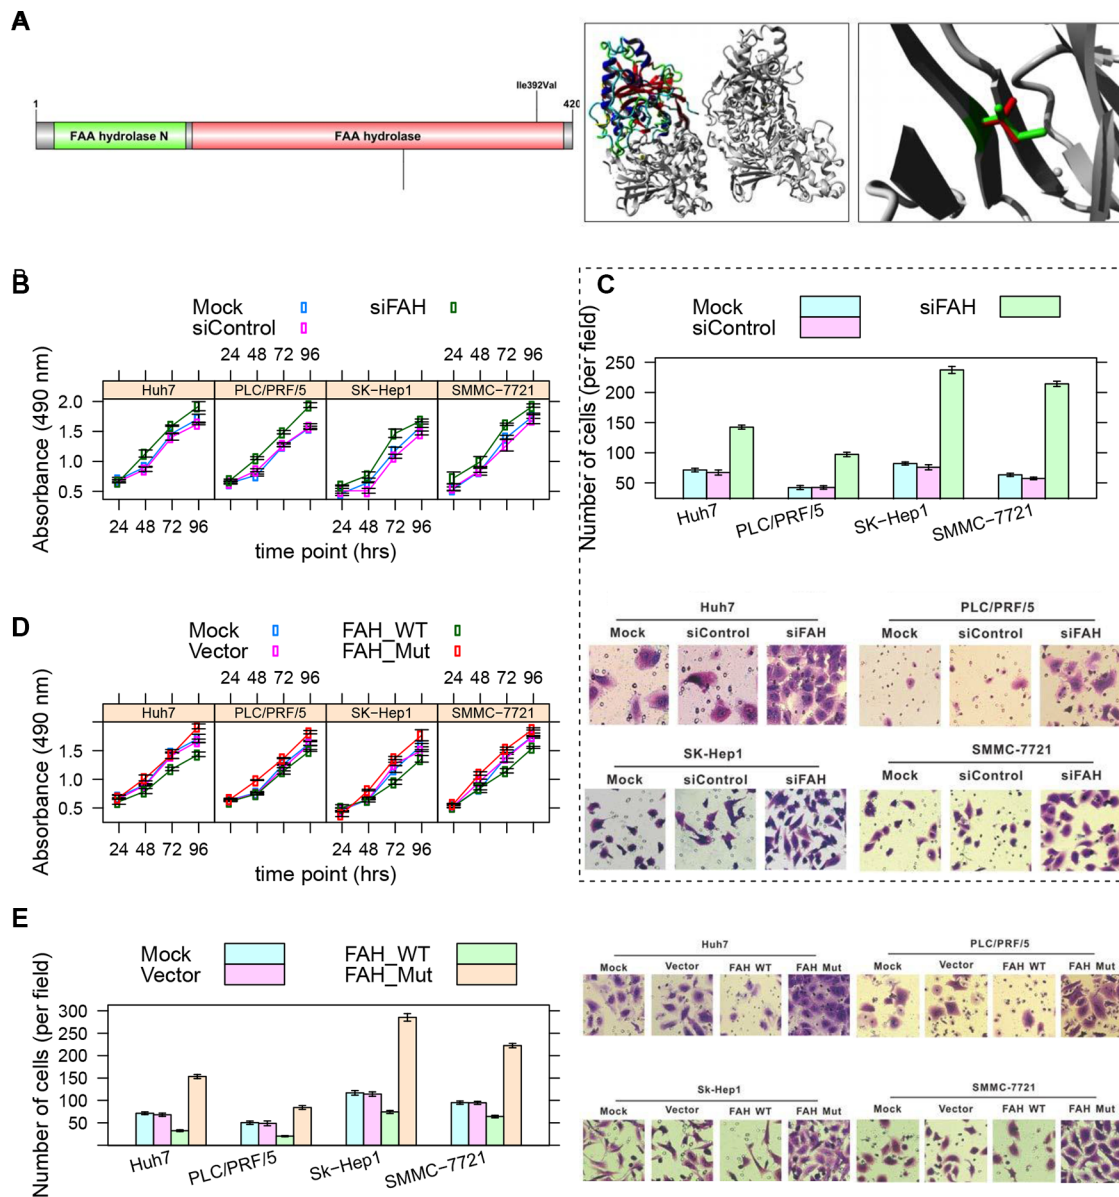

**Supplementary Figure S4: Effects of a loss-of-function mutation in *FAH*.** (A) Schematic diagram of domains (left) and image of crystallographic model based on homologous modeling (right) upon mouse *Fah* (PDB: 1HYO). The I392 residue is located in the FAA hydrolase domain. The side chains of both the wild-type and mutant allele residue are shown in green and red, respectively (right). (B) Cell growth curve. Hepatoma cell lines SMMC-7721, SK-Hep1, PLC/PRF/5 and Huh7 cells were infected with AdsiFAH or AdsiControl, respectively. Cell growth was determined by MTS assay similar to Figure 3B. (C) Transwell assay of cell migration property in hepatoma cells depletion of *FAH*. Magnification:  $\times 200$ . (D) Hepatoma cells were mock-transfected or transfected with *FAH*-WT or *FAH*-Mut (I392V) respectively. Tumor cell growth was measured by MTS assay. (E) Cells were treated as describe in (D). Cell migration were determined by a transwell assay.

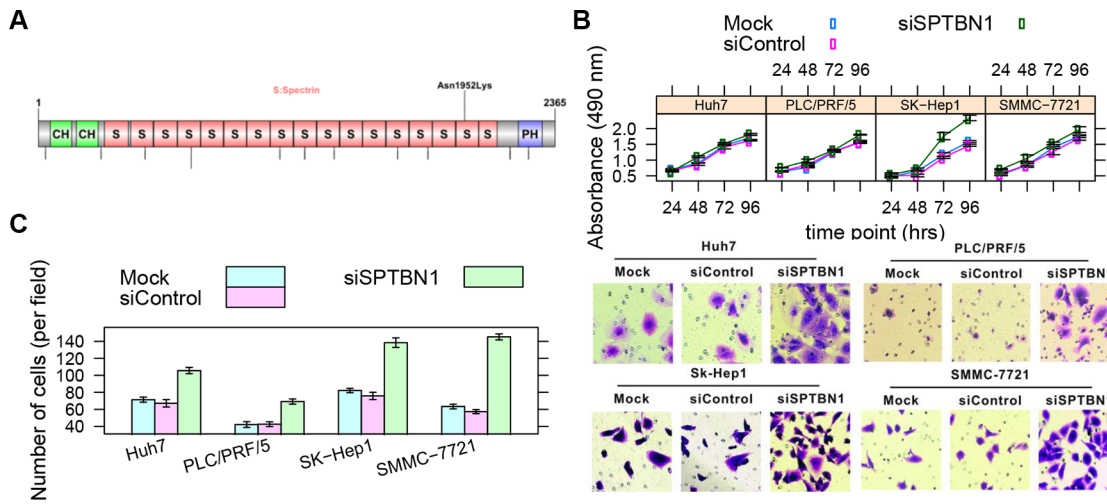

**Supplementary Figure S5: A mutation in *SPTBN1*.** (A) Schematic diagram of domains in *SPTBN1*, and the N1952 residue is located in one of the spectrin repeats (S). (B) Cell growth curve. Hepatoma cell lines SMMC-7721, SK-Hep1, PLC/PRF/5 and Huh7 cells were infected with AdsiSPTBN1 or AdsiControl, respectively. Cell growth was determined by an MTS assay similar to Figure 3B. (C) A transwell assay of cell migration property in hepatoma cells depletion of *SPTBN1*. Magnification:  $\times 200$ .

**Supplementary Table S1: Primers for coding regions of *HNF1A*, *FAH*, *IDH1*, *GNMT*, and *SPTBN1*, and their mutants**

| PCR product        | Sense primer (5'→3')                    | Antisense primer (5'→3')             |
|--------------------|-----------------------------------------|--------------------------------------|
| <i>HNF1A</i>       | catggatccaccatgggttctaactgagccagctgcag  | tacaagctttactgggaggaagaggccatctgggt  |
| <i>HNF1A</i> S247T | atccagagaggggtgacccatcacaggcacag        | tacaagctttactgggaggaagaggccatctgggt  |
| <i>FAH</i>         | catggatccaccatgggctccttcacccggtgccgagga | tacaagctttcatgatggcaggagagcaggcagcac |
| <i>FAH</i> I392V   | ggggatgaagtcatcgtaacacgggtactgccag      | tacaagctttcatgatggcaggagagcaggcagcac |
| <i>IDH1</i>        | catggatccaccatgggctccaaaaaatcagtgccggtt | tactctagattaaagttggcctgagctagttt     |
| <i>IDH1</i> V294M  | ggcatgatgaccagatgctggtttgtccagat        | tactctagattaaagttggcctgagctagttt     |
| <i>GNMT</i>        | catggatccaccatggtgacagcgtgtaccggacc     | tacaagctttcagctgtcctcttgagcacgtggat  |
| <i>GNMT</i> A14T   | tccctgggggtgacggccgaaggct               | tacaagctttcagctgtcctcttgagcacgtggat  |

**Supplementary Table S2: siRNA primers**

| PCR product | Sense primer (5'→3')                 | Antisense primer (5'→3')           |
|-------------|--------------------------------------|------------------------------------|
| siHNF1A 1   | atcaaagagctggagaacctttt              | aaggttctccagctcttgat               |
| siHNF1A 2   | acgaagatggtcaagtcctat                | ataggactgaccatcttcgt               |
| siHNF1A 3   | agcaaagaggcactgatccat                | atggatcagtcctcttgct                |
| siFAH 1     | aatgttcagggacaaggagatt               | atctcctgtccctgaacatt               |
| siFAH 2     | aggctttggccagtgtgctgt                | acagcacactggccaaagc                |
| siIDH1 1    | aggagaaaacttgaagatcat                | atgatctcaagttttctct                |
| siIDH1 2    | acaaactagctcaggccaaatt               | attggcctgagctagttgt                |
| siIDH1 3    | atcaaactagctcaggccaaatt              | attggcctgagctagttgat               |
| siGNMT 1    | accagtgacaagatgctgaatt               | atcagcatctgtcactggtt               |
| siGNMT 2    | atgtggatgccagtgacaagtt               | atcagcatctgtcactggct               |
| siGNMT 3    | atgtggatgccagtgacaagtt               | actgtcactggcatccacatt              |
| siSPTBN1 1  | aagacctgtctgaagagagatt               | atctctctcagcaaggctct               |
| siSPTBN1 2  | aaagacaacaagagaagaatt                | attctctcttgtgtctttt                |
| siSPTBN1 3  | acaacaaggcctgggaaagatt               | atcttcccaggccttgtgt                |
| pGL3-HNF4A  | tacgggtaccgctcaggaaggcaatgtgagacctgt | cataagctcatctaacaatattattgagcaccta |

**Supplementary Table S3: DNA sequencing primers**

| PCR product   | Sense primer (5'→3')   | Antisense primer (5'→3') |
|---------------|------------------------|--------------------------|
| <i>HNF1A</i>  | cctggcattggaaccagat    | ccctgtccccacataccac      |
| <i>GNMT</i>   | gatggtggacagcgtgtacc   | gttccaggattggcaaaggc     |
| <i>IDH1</i>   | agactcagtgtcttctcatgca | tggtgatgacttgcacaca      |
| <i>FAH</i>    | tctgcagtgatcccaccaag   | cagagactctgggaggcaga     |
| <i>SPTBN1</i> | gctcaggagtgattcagacc   | tctagacgcacaggaaagga     |
